# Supplementary material
Source: PubMed Central journal article supplement (PMC2675722)
Supplement: pp.108.133918_1.pdf [file pp.108.133918_1.pdf]

## Supplemental Data

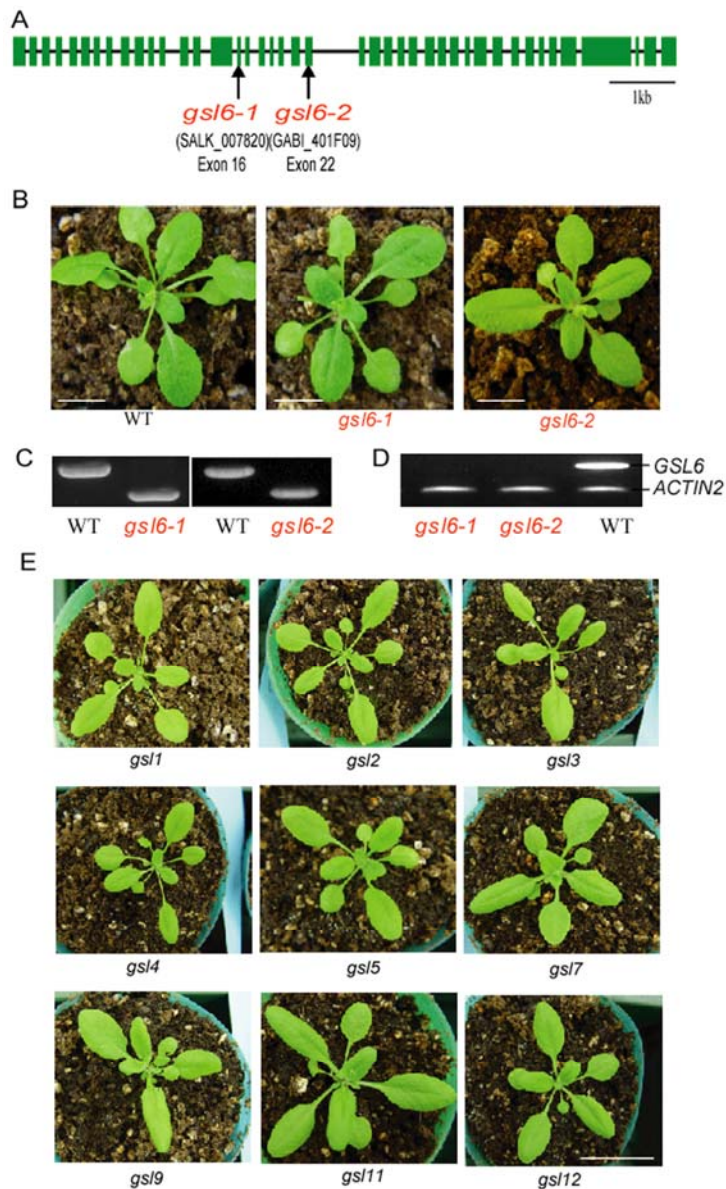

**Figure S1.** Loss-of-function mutations in the *GSL* gene family. (A to D) Isolation of knock-out mutants for *GSL6*. (A) Schematic representation of T-DNA insertions in the *GSL6* gene. (B) The *gsl6* seedling mutant phenotypes resemble the wild-type in vegetative development. (C) Genotyping PCR results of *GSL6* T-DNA alleles. (D) RT-PCR analysis showing likely null mutations. Total RNA was extracted from 20-day-old wild-type and mutant plants. (E) Developmental phenotypes at rosette leaf stage in *gsl* mutants. Not included: *gsl6*, *gsl8*, and *gsl10*. Scale bars = 1 cm.

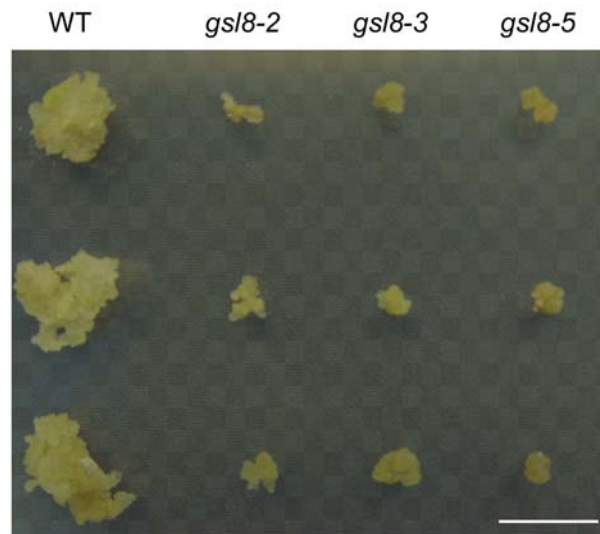

**Figure S2.** Calli induction from *gsl8* mutant seedlings. Three replicates are shown. Cotyledons from 7-day old WT, *gsl8-2*, *gsl8-3* and *gsl8-5* mutant seedlings were grown on calli-inducing medium for three weeks. Scale bar = 1 cm.

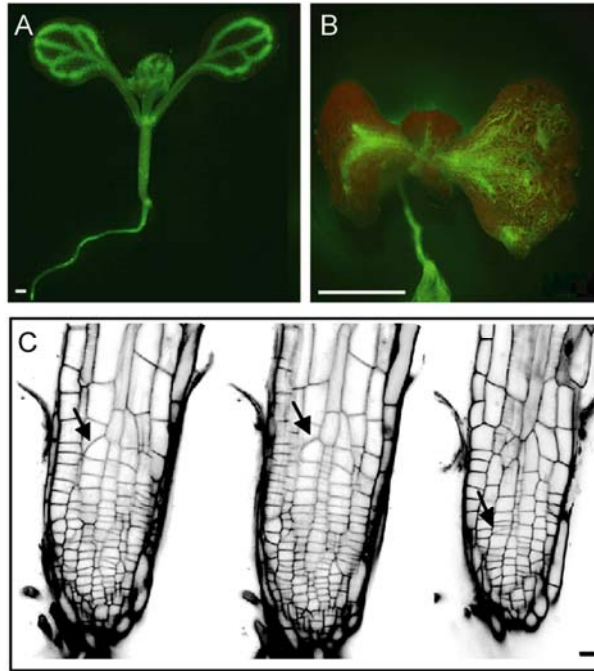

**Figure S3.** Patterning phenotypes of *gsl8* mutants. (A and B) Comparison of vascular patterns in wild-type (A) and *gsl8-4* (B) cotyledons after the incubation of root tips in the membrane-impermeable HPTS dye (8-hydroxypyrene-1,3,6-trisulphonic acid). Root tips from wild-type and homozygous *gsl8-4* mutant seedlings were cut to allow dye penetration, and a 1.0-2.0  $\mu$ l drop of HPTS-acetate (5 mg/ml) was applied. The seedlings were imaged with a fluorescent dissection microscope (SZX12, Olympus) after translocation had proceeded for 30-60 min. Some veins in *gsl8-4* appeared to end abruptly. Other five *gsl8* mutant alleles showed similar results to those of *gsl8-4*. (C) Propidium iodide stained root tips (*gsl8-4*). All PI images have inverted grayscale. Arrows indicate aberrant division planes. Scale bars: 1 mm in (A, B), 10  $\mu$ m in (C).

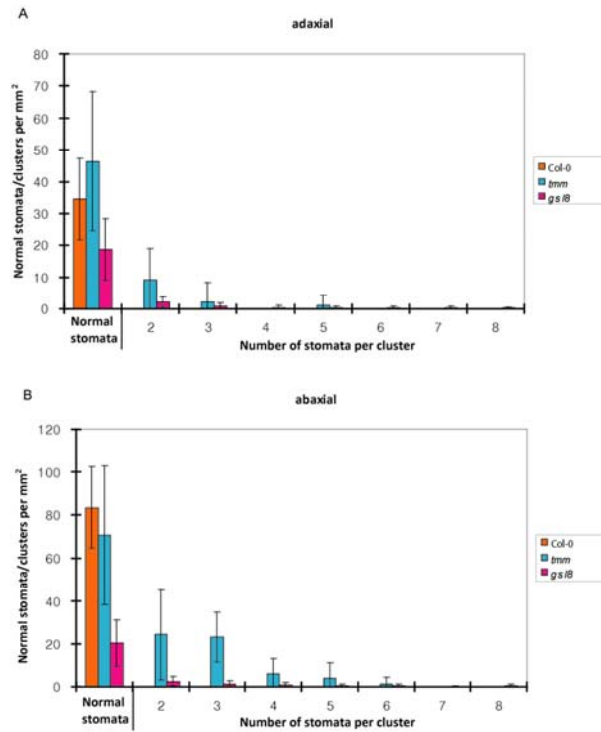

**Figure S4.** Distribution of normal stomata and of clustered stomata in the epidermis of cotyledons in wild-type, *tmm*, and *gsl8-4*. (A) Adaxial epidermis. (B) Abaxial epidermis. Bars are SD. The stomatal density and stomatal index of 10-day-old cotyledons of *gsl8-4* and *tmm* mutants (a representative mutant of stomatal clustering) were measured using light microscopy. The area of the microscope field was calculated using the ImageJ program. The number of fields and plants scored were 78 and 25 for *gsl8*, 20 and 15 for *tmm*, and 10 and 3 for Col-0.

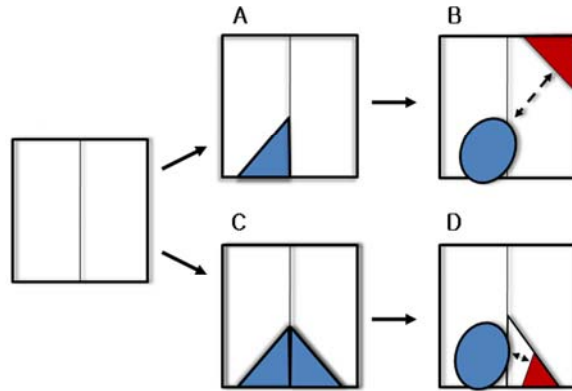

**Figure S5.** Primary and secondary stomatal patterning mechanisms in wild-type Arabidopsis. Both mechanisms involve oriented asymmetric divisions. Stomatal precursor cells are shown as triangles (meristemoids) and ovals (guard mother cells, GMCs). Meristemoids develop into GMCs, but often first divide asymmetrically (amplifying divisions). (A and B) Primary mechanism: Intercellular signaling (double-headed arrow) might orient the new asymmetric division in a neighbor cell (cell at right) away from a previously formed meristemoid (now the blue oval GMC at left). (C and D) Secondary mechanism: simultaneous entry divisions in both cells can cause meristemoids to form in contact (C). Intercellular signaling (double headed arrow) might orient the asymmetric division of one meristemoid so that the regenerated meristemoid (red) no longer contacts the other precursor cell, here the GMC at the left in (D).

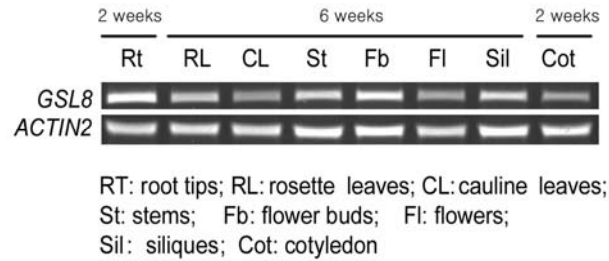

**Figure S6.** *GSL8* is expressed in all organs tested using RT-PCR. Organs included were from 2-week-old or 6 week-old seedlings grown on MS medium and included root tips (Rt), cotyledons (Cot), rosette leaves (RL), cauline leaves (CL), stems (St), floral buds (Fb), flowers (Fl), and siliques (Sil) .

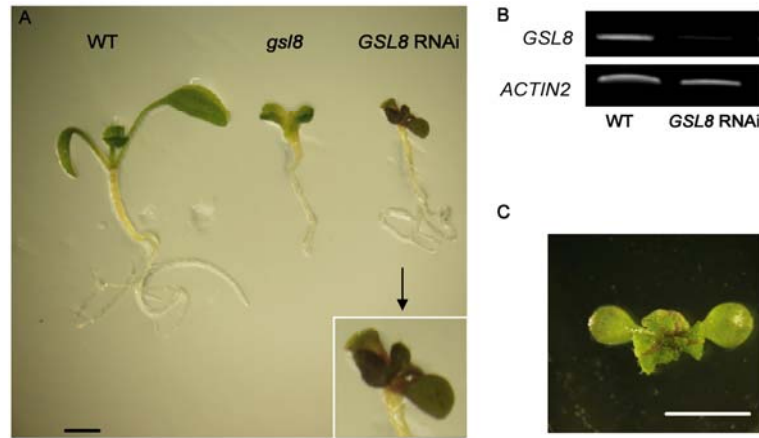

**Figure S7.** Dexamethasone-inducible RNAi line of *GSL8* phenocopies T-DNA insertional mutants. (A) 10-day-old seedlings of wild-type, *gsl8-4* and RNAi line. (B) *GSL8* expression is reduced in an RNAi background. *ACTIN2* was used as an internal control. (C) 3-week-old *GSL8* RNAi seedling. Dexamethasone was treated at 4 days after germination.

## Supplemental Tables

**Table S1.** Identity of T-DNA insertion lines in *GSL* family genes (excluding *GSL8* and *GSL10*).

| GSL           | Cals           | AGI code  | Mutant ID       | Background |
|---------------|----------------|-----------|-----------------|------------|
| <i>GSL1</i>   | <i>CalS11</i>  | At4g04970 | GABI_236G11     | Col        |
| <i>GSL2-2</i> | <i>CalS5-2</i> | At2g13680 | SALK_026354 (1) | Col        |
| <i>GSL3</i>   | <i>CalS2</i>   | At2g31960 | SALK_011560     | Col        |
| <i>GSL4</i>   | <i>CalS8</i>   | At3g14570 | SALK_047978     | Col        |
| <i>GSL5</i>   | <i>CalS12</i>  | At4g03550 | GABI_089H05 (2) | Col        |
| <i>GSL6-1</i> | <i>CalS1-1</i> | At1g05570 | SALK_007820     | Col        |
| <i>GSL6-2</i> | <i>CalS1-2</i> | At1g05570 | GABI_401F09     | Col        |
| <i>GSL7</i>   | <i>CalS7</i>   | At1g06490 | SALK_048921     | Col        |
| <i>GSL9</i>   | <i>CalS4</i>   | At5g36870 | SALK_009569     | Col        |
| <i>GSL11</i>  | <i>CalS6</i>   | At3g59100 | SALK_019534     | Col        |
| <i>GSL12</i>  | <i>CalS3</i>   | At5g13000 | SALK_003469     | Col        |



**Table S2.** Segregation analysis of *GSL8/gsl8*.

| Line            | No Sucrose |            |      |       | 3% Sucrose |            |      |       |
|-----------------|------------|------------|------|-------|------------|------------|------|-------|
|                 | Total      | Germinated | Homo | Homo% | Total      | Germinated | Homo | Homo% |
| <i>gsl8-2/+</i> | 500        | 458        | 11   | 2.3   | 427        | 420        | 46   | 9.9   |
| <i>gsl8-3/+</i> | nt         | nt         | nt   | nt    | 200        | 200        | 36   | 15.3  |
| <i>gsl8-5/+</i> | 500        | 463        | 13   | 2.7   | 400        | 382        | 36   | 8.6   |
| Total           | 1000       | 921        | 24   | 2.5   | 1027       | 1002       | 118  | 10.5  |

nt: non-tested

**Table S3.** Primers used to isolate homozygous *gsl* family mutants.

| Primer name      | Primer sequence                |
|------------------|--------------------------------|
| <i>GSL1</i> LP   | 5'- GTATACCTCTAGTGACGGCGC -3'  |
| <i>GSL1</i> RP   | 5'-TCCTAATTGTCACGAGTTCCAG -3'  |
| <i>GSL2-2</i> LP | 5'- ACCTCTCCCAAACGATCAAAG -3'  |
| <i>GSL2-2</i> RP | 5'- TGGATCGAGAATTCAGACTGG -3'  |
| <i>GSL3</i> LP   | 5'- GTGCCTCGCTGTAGATTATCG -3'  |
| <i>GSL3</i> RP   | 5'- ACAGCAGCAGTTTGATATGCC -3'  |
| <i>GSL4</i> LP   | 5'- ACTCCATGCAATTCATATGCC -3'  |
| <i>GSL4</i> RP   | 5'- CTCCTCTCGATAAAGGAGGG -3'   |
| <i>GSL5</i> LP   | 5'- GGAAATCCCATCCTCAGTCTC -3'  |
| <i>GSL5</i> RP   | 5'- TTTGTTAACGCAGATGCTGC -3'   |
| <i>GSL6-1</i> LP | 5'- CTGTTCTTGCAAAACCAATGG -3'  |
| <i>GSL6-1</i> RP | 5'- TCCTCCTCCCTGTTTTCTAGC -3'  |
| <i>GSL6-2</i> LP | 5'- ATCAAACAGTGGAGATCGGTG -3'  |
| <i>GSL6-2</i> RP | 5'- ACAAAGCGCTCTCATGCATAC -3'  |
| <i>GSL7</i> LP   | 5'- CGATAGAGGTTCCAAAACGTG -3'  |
| <i>GSL7</i> RP   | 5'- ATGGATGGTTTTCTATTGGC -3'   |
| <i>GSL9</i> LP   | 5'- GACAATAGCCGAGGTTGTTTG -3'  |
| <i>GSL9</i> RP   | 5'- ATATAAGCCCGCGGTATACCG -3'  |
| <i>GSL11</i> LP  | 5'- TATTTGACACATGCCTGCTTG -3'  |
| <i>GSL11</i> RP  | 5'- CAATCCCCAGTCCAAGTACTG -3'  |
| <i>GSL12</i> LP  | 5'- GGGCAATCTCAACAAGAGATG -3'  |
| <i>GSL12</i> RP  | 5'- CTTTGATAAAATGGTTGGCCAG -3' |

**Table S4.** Primers used to isolate homozygous *gsl8* mutants.

| Primer name      | Primer sequence               |
|------------------|-------------------------------|
| <i>GSL8-1</i> LP | 5'-TAGTTCCGCAGACAAAGTTGC-3'   |
| <i>GSL8-1</i> RP | 5'-TCACATGCATATAGCTGTGGG-3'   |
| <i>GSL8-2</i> LP | 5'-TTCAGAAGTTGCATCTGCATG-3'   |
| <i>GSL8-2</i> RP | 5'-ACACTCTGGAAGAAAGCGGAC-3'   |
| <i>GSL8-3</i> LP | 5'-CTTATGTATGGCGCCTACAGC-3'   |
| <i>GSL8-3</i> RP | 5'-CACCACAGGTGAATTCAGATATG-3' |
| <i>GSL8-4</i> LP | 5'-GCATCACACCAGCCTAAAATC-3'   |
| <i>GSL8-4</i> RP | 5'-ATATGCTGCGATGTTTTACC-3'    |
| <i>GSL8-5</i> LP | 5'-CCCAAGCCTCGTCTTTCTAAG-3'   |
| <i>GSL8-5</i> RP | 5'-GGTTTACTTGCCCTCACAAATC-3'  |
| <i>GSL8-6</i> LP | 5'-GGGACTGTGCATTTGAAAGTG-3'   |
| <i>GSL8-6</i> RP | 5'-TTTCATTCGGCAGTGATTTTC-3'   |

T-DNA (LB1) for SALK mutants: 5'-TGGTTCACGTAGTGGGCCATCG-3'

T-DNA (LB1) for GABI mutants: 5'-CCCATTTGGACGTGAATGTAGACAC-3'

T-DNA (LB3) for SAIL mutants 5'-TAGCATCTGAATTCATAACCAATCTCGATACAC-3'

## Supplemental References

- (1) Dong, X., Hong, Z., Sivaramakrishnan, M., Mahfouz, M. and Verma, D.P.S. (2005) Callose synthase (CalS5) is required for exine formation during microgametogenesis and for pollen viability in Arabidopsis. *Plant J.* **42**, 315-328.
- (2) Jacobs, A.K., Lipka, V., Burton, R.A., Panstruga, R., Strizhov, N., Schulze-Lefert, P. and Fincher, G.B.J. (2003) An Arabidopsis Callose Synthase, *GSL5*, Is Required for

Wound and Papillary Callose Formation. *Plant Cell*, **15**, 2503-2513
